# Supplementary material for: Investigation of molecular biomarker candidates for diagnosis and prognosis of chronic periodontitis by bioinformatics analysis of pooled microarray gene expression datasets in Gene Expression Omnibus (GEO)
Source: PubMed Central journal article supplement (PMC6438035; doi:10.1186/s12903-019-0738-0), 2019-03-28
Supplement: 12903_2019_738_MOESM2_ESM.pdf [file 12903_2019_738_MOESM2_ESM.pdf]

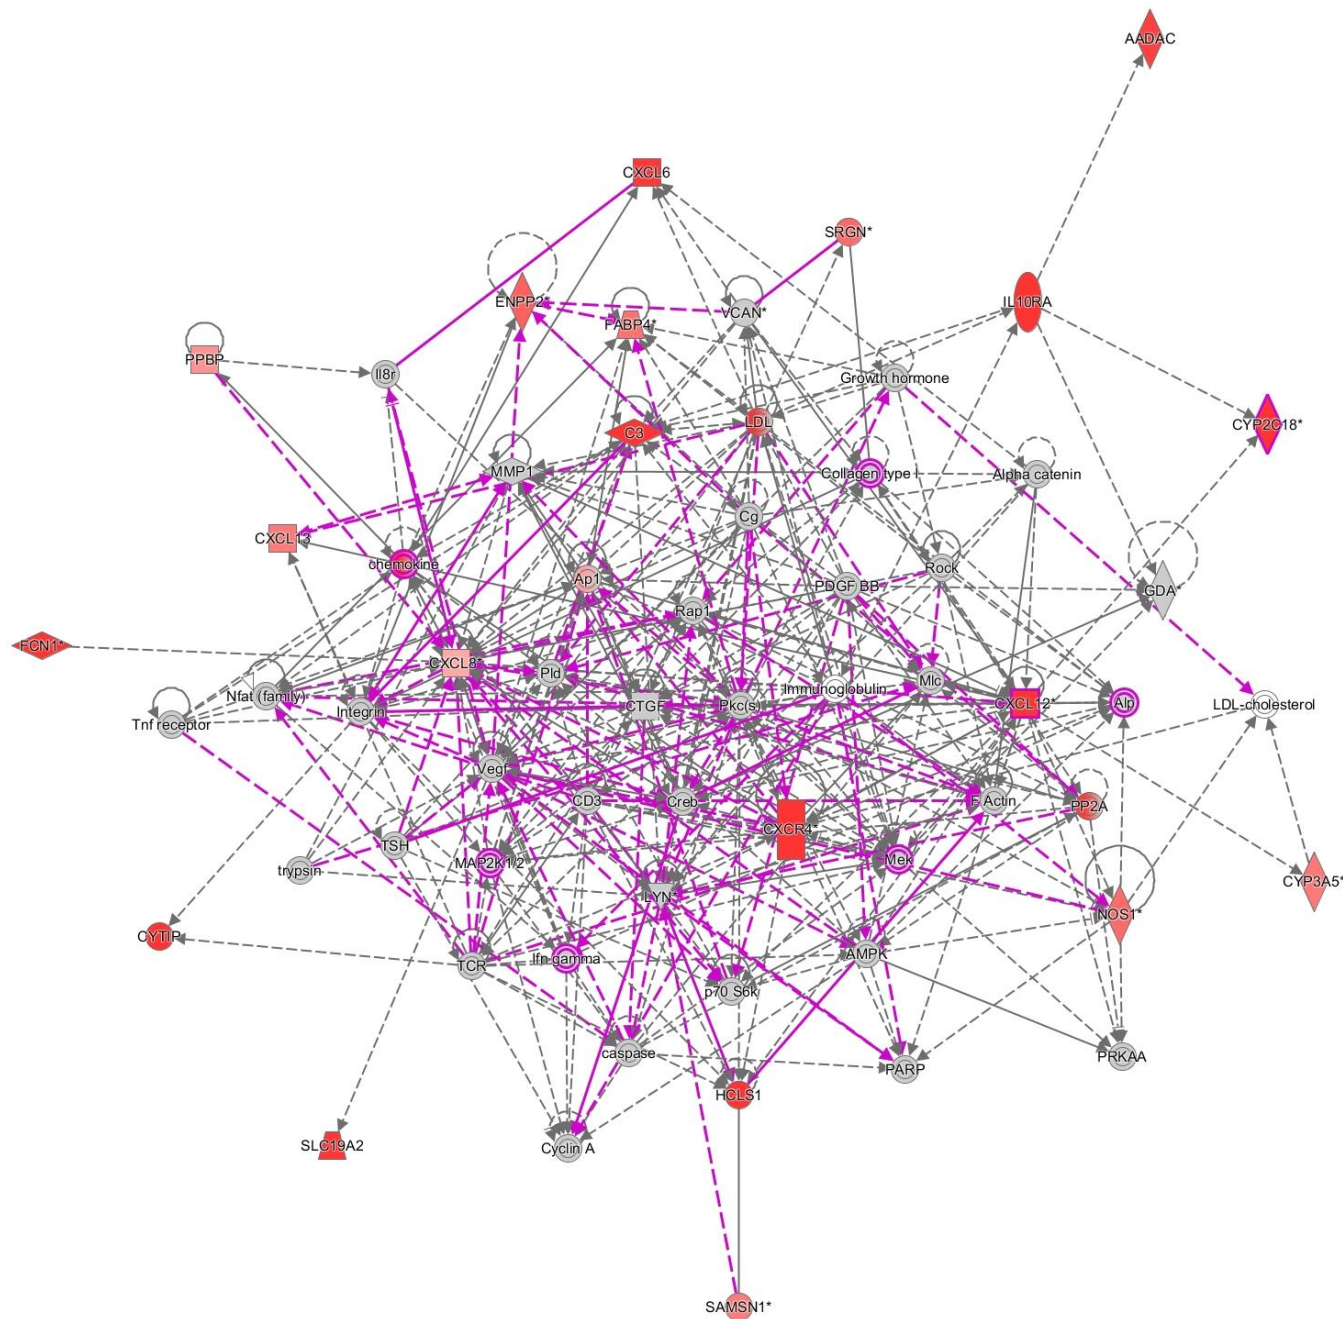

- Network shapes**
- Complex/Group
  - Cytokine
  - ◇ Enzyme
  - ◇ Peptidase
  - △ Phosphatase
  - Other
  - G-protein Coupled Receptor
  - Transmembrane Receptor
  - Transcription Regulator
  - Growth Factor
  - Transporter
  - ▽ Kinase

more extreme in dataset      less

**● Increased measurement**      ●

- A — B      chemical-chemical interactions, chemical-protein interactions, correlation, protein-protein interactions, RNA-RNA interactions: non targeting interactions
- A → B      activation, causation, expression, localization, membership, modification, molecular cleavage, phosphorylation, protein-DNA interactions, protein-RNA interactions, regulation of binding, transcription
- A — B      inhibition, ubiquitination
- A → B      inhibits and acts on
- A — ○ B      leads to
- A → B      processing yields
- A → B      RNA-RNA interactions: microRNA targeting
- A → B      translocation
- A → B      reaction
- direct interaction
- - -      indirect interaction

Supplementary Figure 2.
