# Supplementary material for: Investigation of molecular biomarker candidates for diagnosis and prognosis of chronic periodontitis by bioinformatics analysis of pooled microarray gene expression datasets in Gene Expression Omnibus (GEO)
Source: PubMed Central journal article supplement (PMC6438035; doi:10.1186/s12903-019-0738-0), 2019-03-28
Supplement: 12903_2019_738_MOESM6_ESM.pdf [file 12903_2019_738_MOESM6_ESM.pdf]

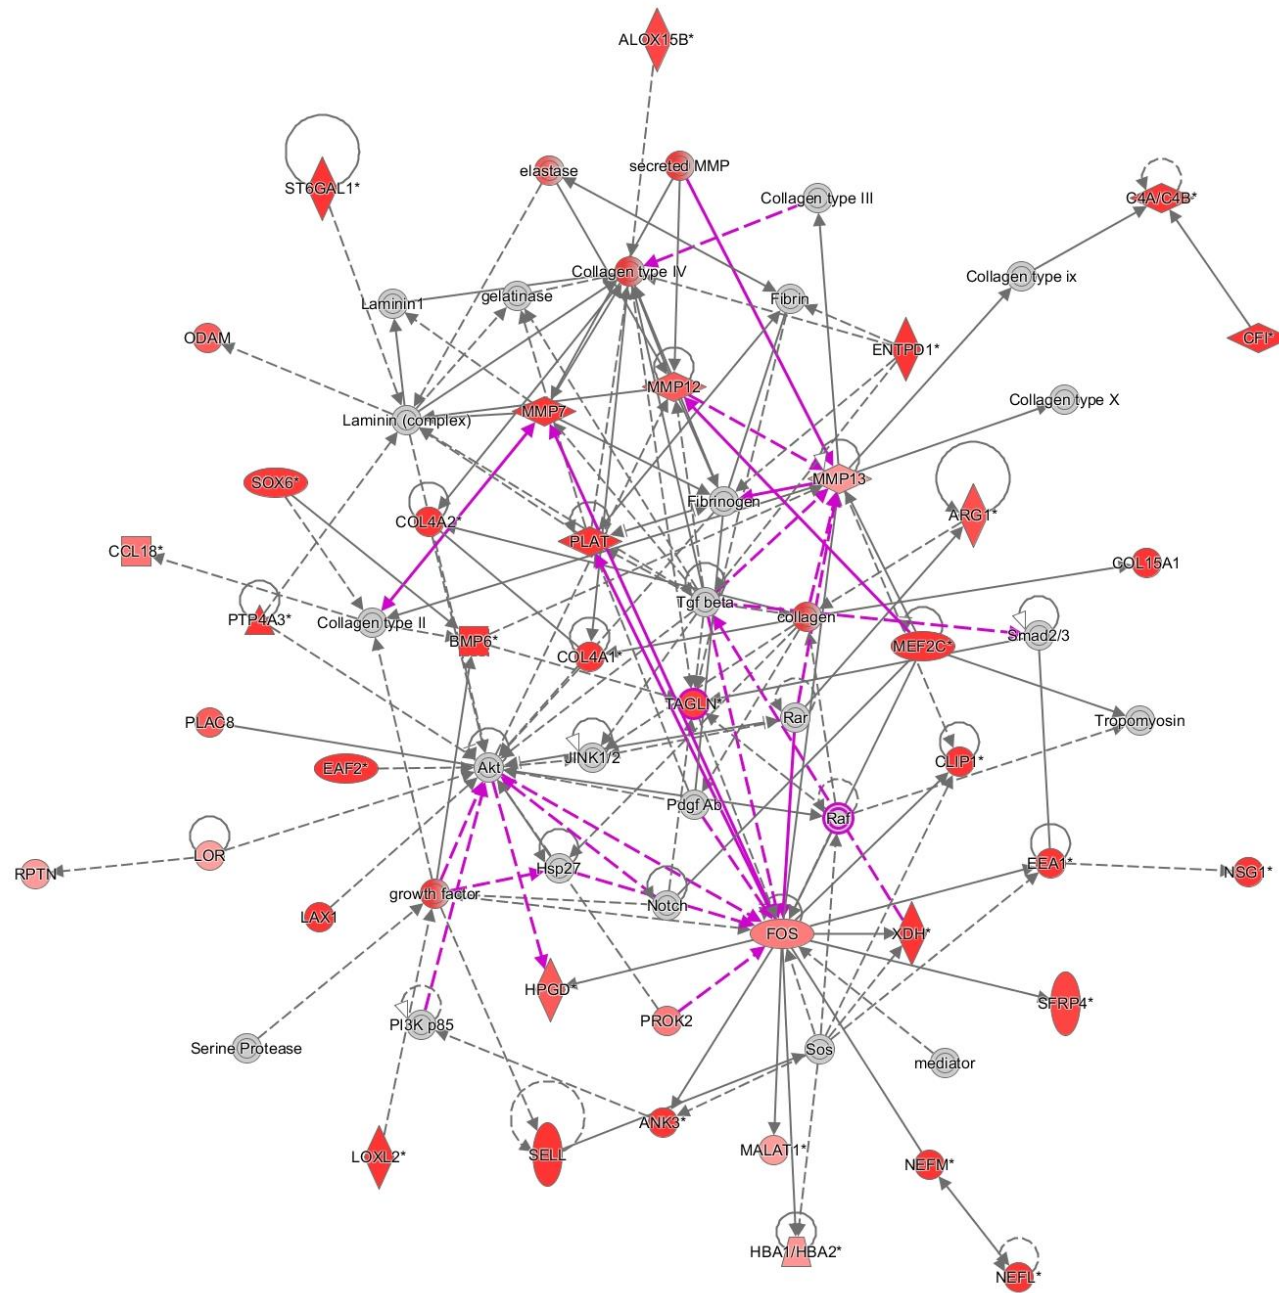

**Network shapes**

|                 |                              |
|-----------------|------------------------------|
| ○ Complex/Group | □ G-protein Coupled Receptor |
| ◇ Cytokine      | ○ Transmembrane Receptor     |
| ◇ Enzyme        | ○ Transcription Regulator    |
| ◇ Peptidase     | ○ Growth Factor              |
| △ Phosphatase   | ▽ Transporter                |
| ○ Other         | ▽ Kinase                     |

more extreme in dataset      less

**Increased measurement** (Red circle)      **less** (Pink circle)

|           |                                                                                                                                                                                                          |
|-----------|----------------------------------------------------------------------------------------------------------------------------------------------------------------------------------------------------------|
| (A) — (B) | chemical-chemical interactions, chemical-protein interactions, correlation, protein-protein interactions, RNA-RNA interactions: non targeting interactions                                               |
| (A) → (B) | activation, causation, expression, localization, membership, modification, molecular cleavage, phosphorylation, protein-DNA interactions, protein-RNA interactions, regulation of binding, transcription |
| (A) — (B) | inhibition, ubiquitination                                                                                                                                                                               |
| (A) → (B) | inhibits and acts on                                                                                                                                                                                     |
| (A) — (B) | leads to                                                                                                                                                                                                 |
| (A) → (B) | processing yields                                                                                                                                                                                        |
| (A) → (B) | RNA-RNA interactions: microRNA targeting                                                                                                                                                                 |
| (A) → (B) | translocation                                                                                                                                                                                            |
| (A) → (B) | reaction                                                                                                                                                                                                 |
| —         | direct interaction                                                                                                                                                                                       |
| - - -     | indirect interaction                                                                                                                                                                                     |

Supplementary Figure 6.
