# Supplementary figures and images for: Investigation of molecular biomarker candidates for diagnosis and prognosis of chronic periodontitis by bioinformatics analysis of pooled microarray gene expression datasets in Gene Expression Omnibus (GEO)
Source: PubMed Central journal article supplement (PMC6438035; doi:10.1186/s12903-019-0738-0), 2019-03-28

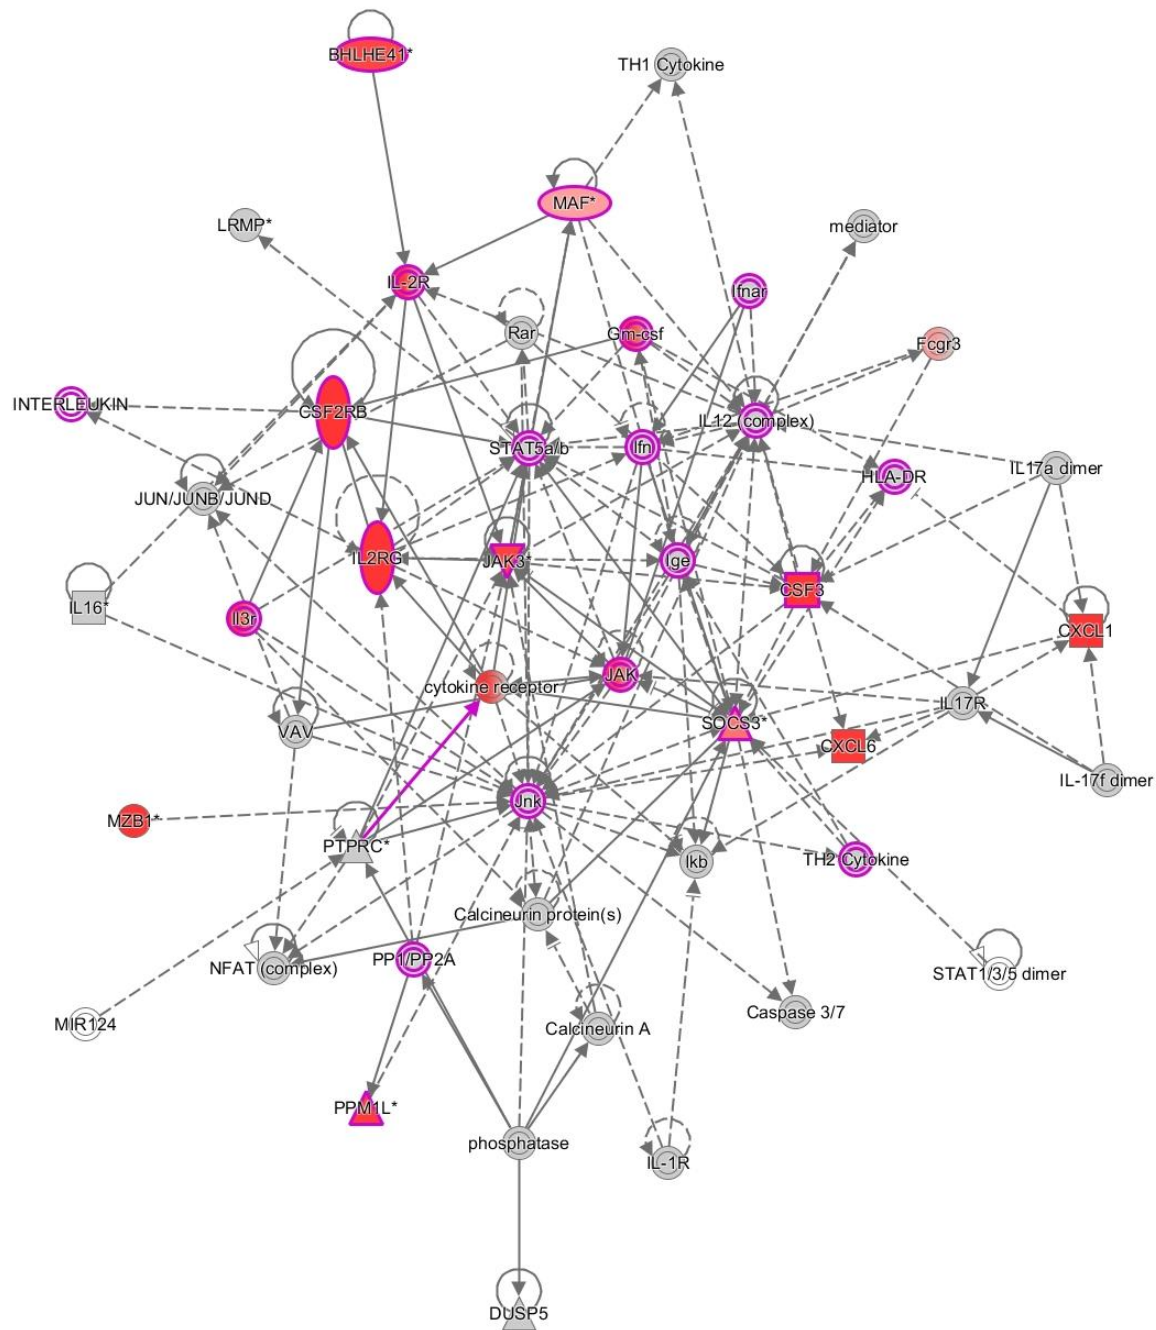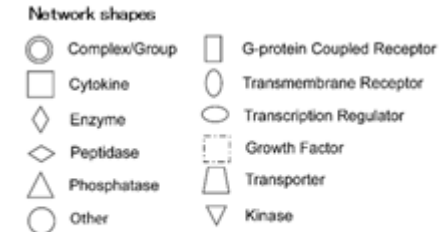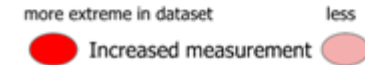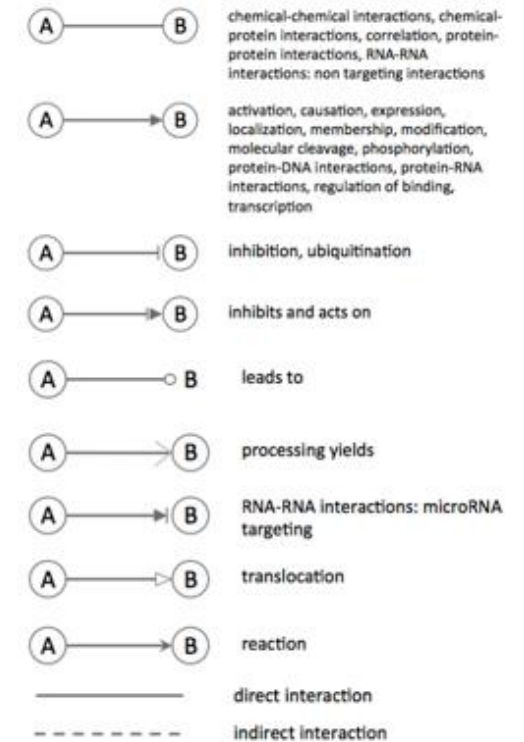

Supplementary Figure 1.

Supplement: 12903_2019_738_MOESM1_ESM.pdf [file 12903_2019_738_MOESM1_ESM.pdf]

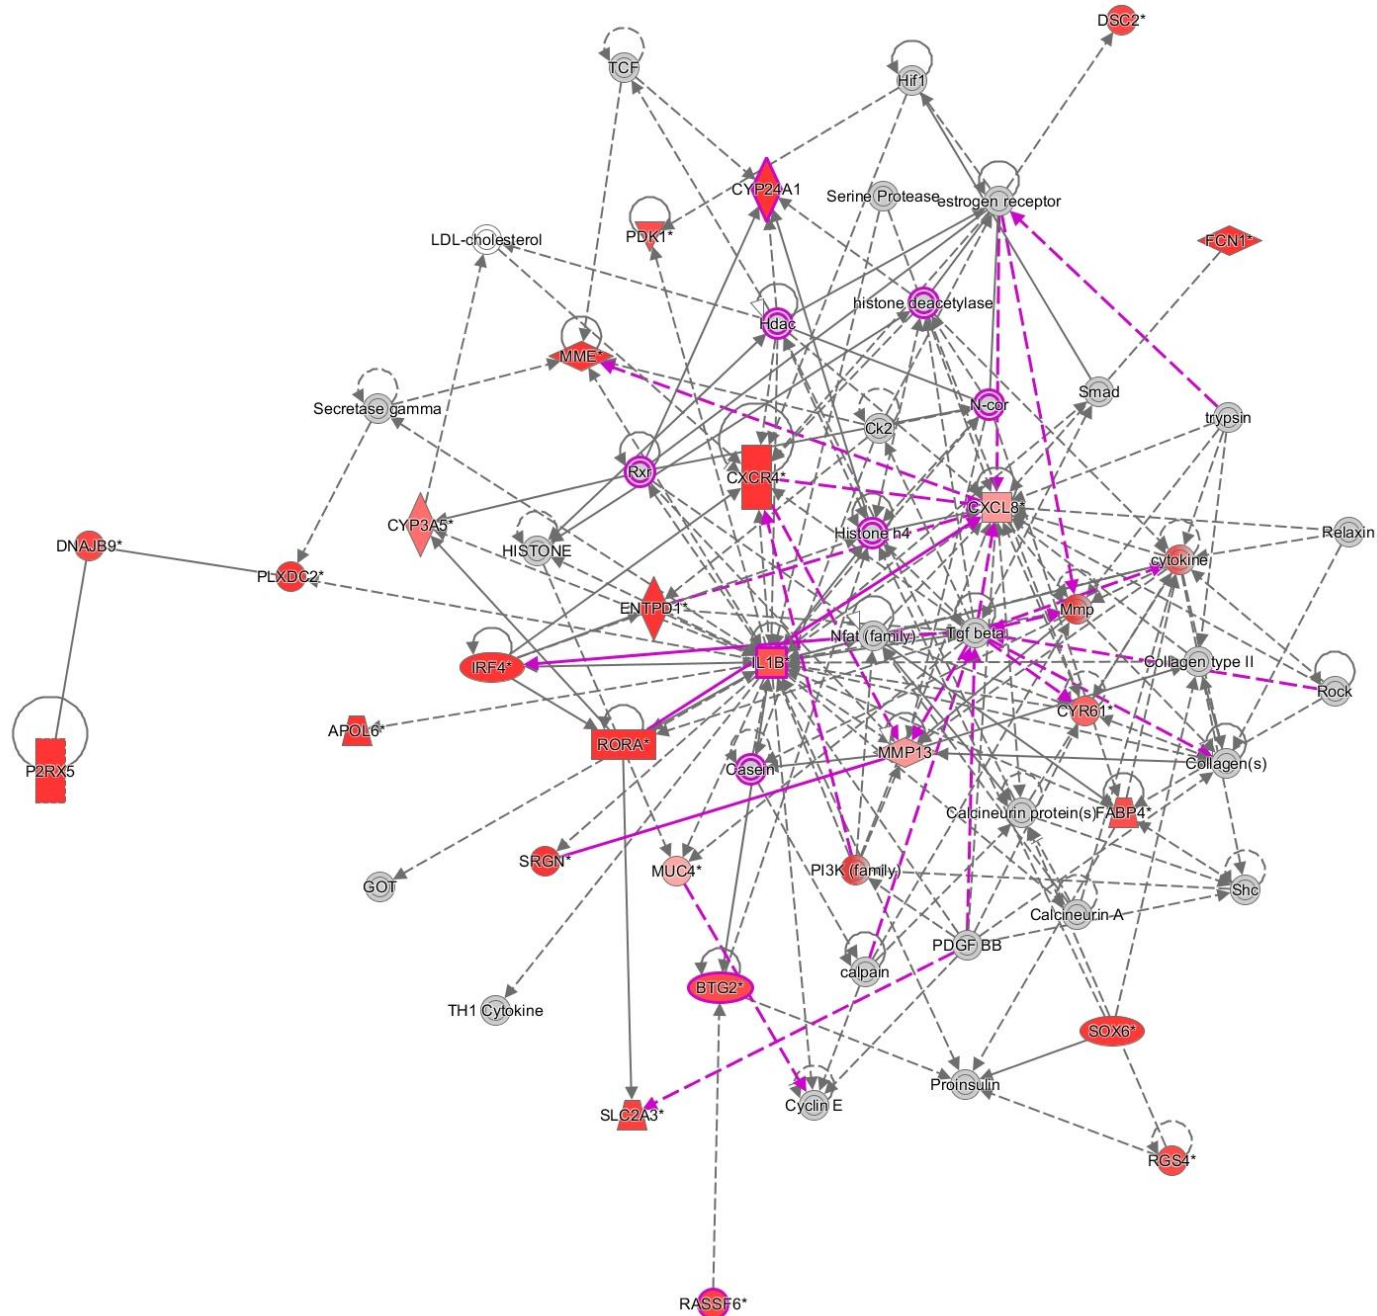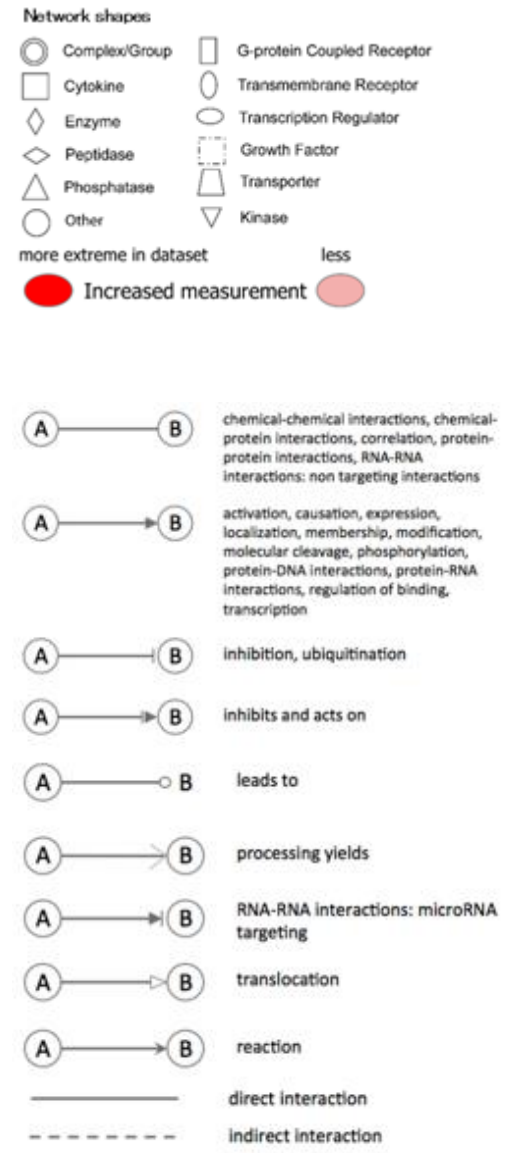

Supplementary Figure 3.

Supplement: 12903_2019_738_MOESM3_ESM.pdf [file 12903_2019_738_MOESM3_ESM.pdf]

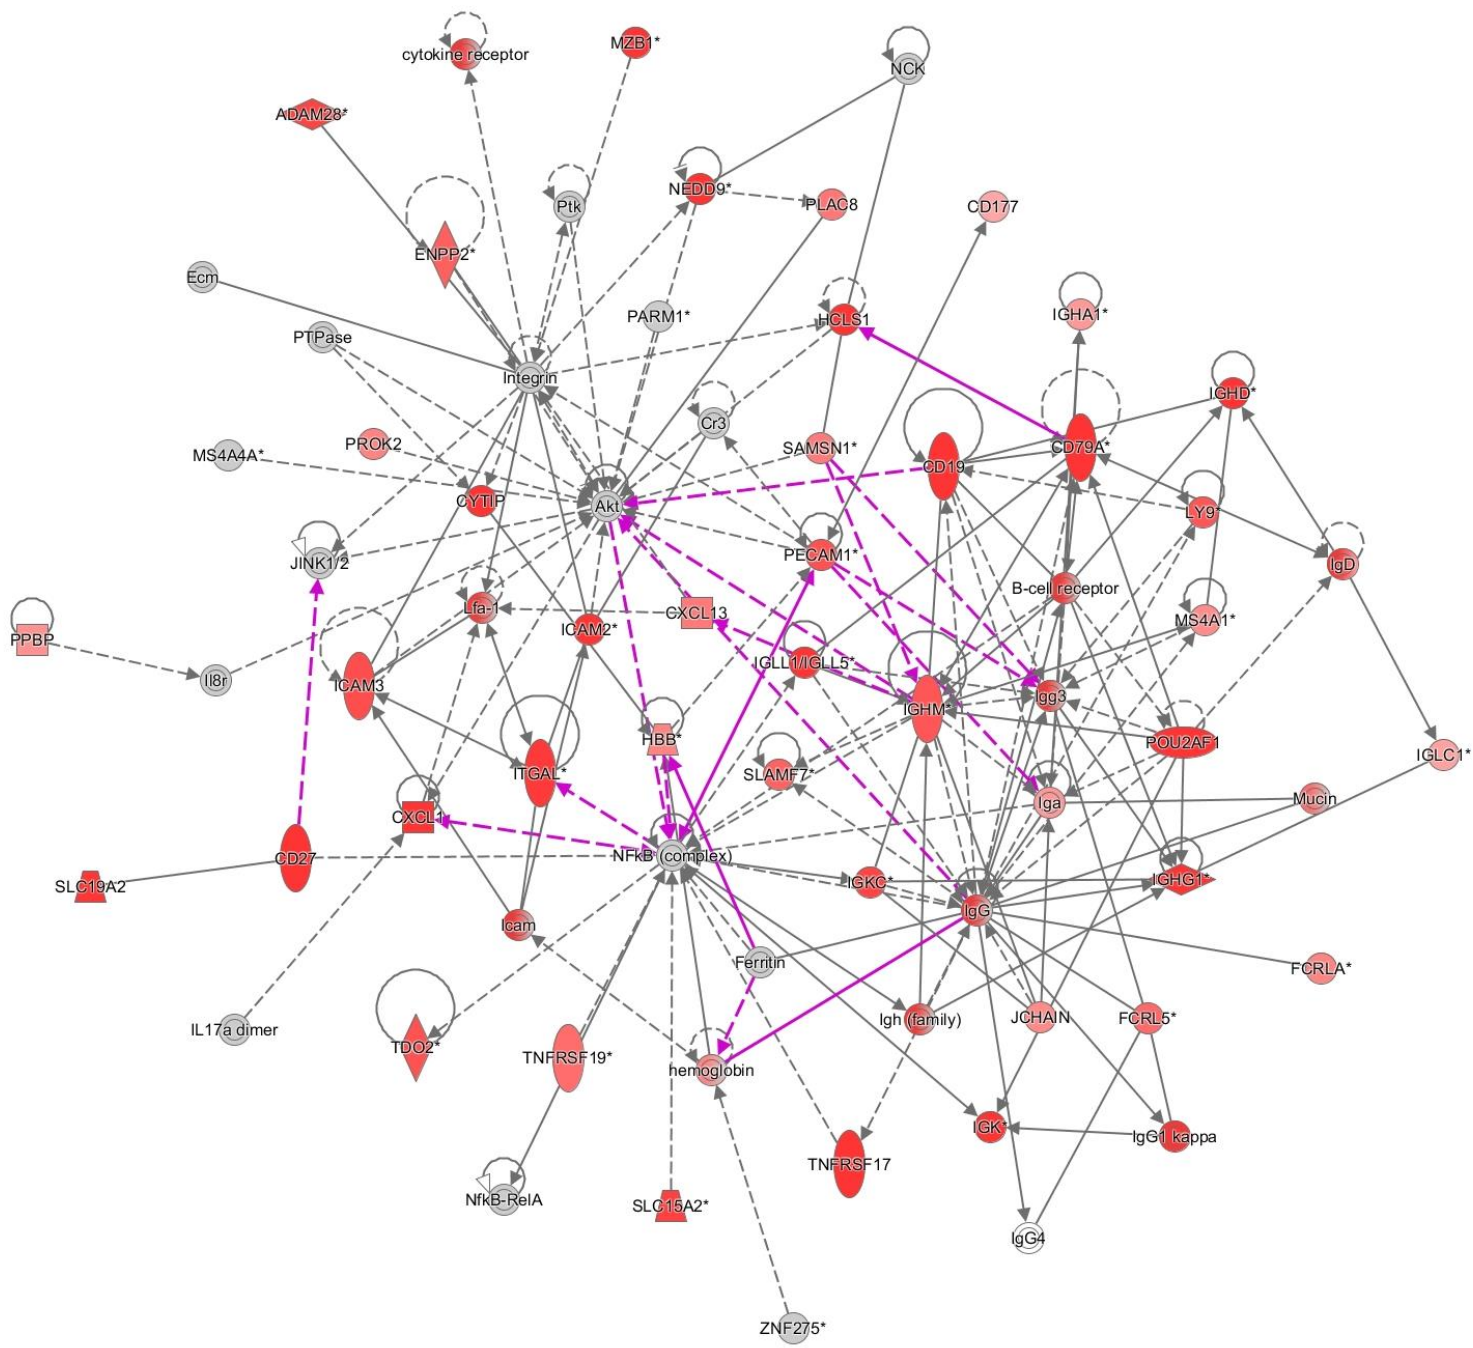

Supplementary Figure 4.

Supplement: 12903_2019_738_MOESM4_ESM.pdf [file 12903_2019_738_MOESM4_ESM.pdf]
